# Supplementary material for: Ribosomal RNA diversity predicts genome diversity in gut bacteria and their relatives
Source: PubMed Central journal article supplement — Nucleic Acids Res. 2010 Mar 2;38(12):3869–79. doi: 10.1093/nar/gkq066 (PMC2896507; doi:10.1093/nar/gkq066), 2010-03-02
Supplement: gkq066_1.pdf [file gkq066_1.pdf]

613 **Supplemental Figures**

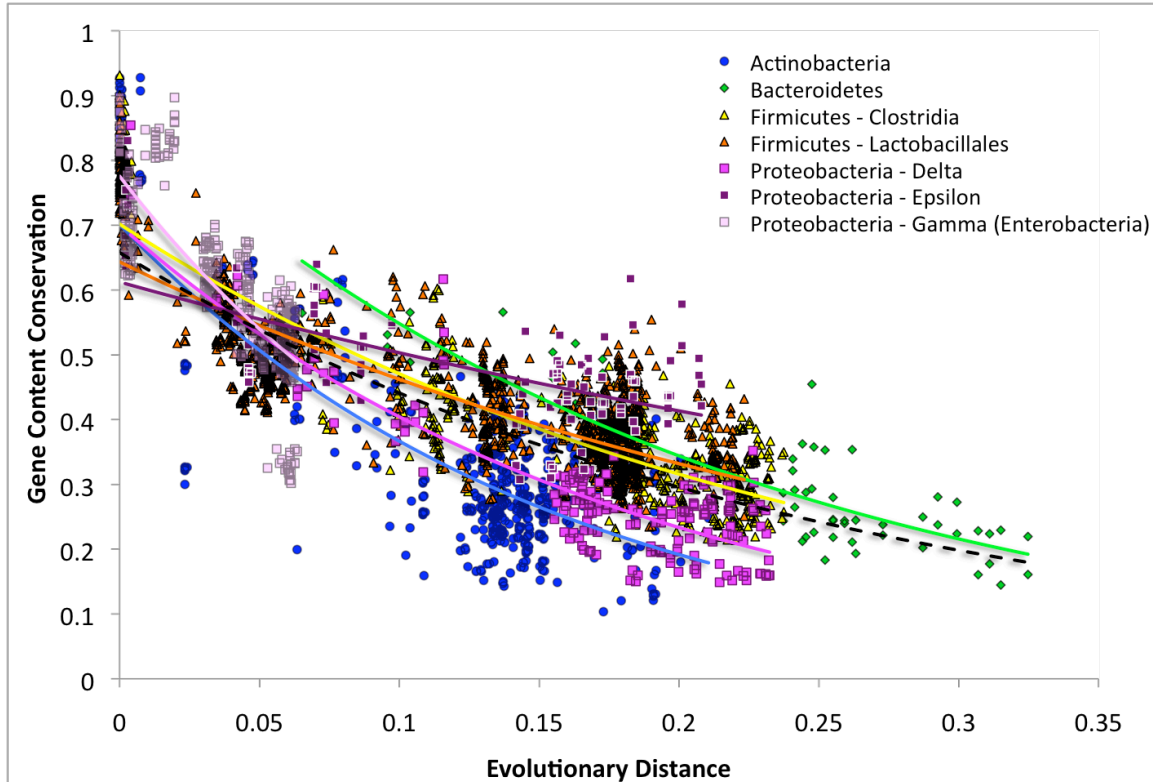

614

615 **Supplemental Figure 1. Gene conservation by evolutionary distance.** Gene  
 616 sequence conservation at the peptide level. Each point represents a BLAST comparison  
 617 between two genomes at a  $10^{-10}$  threshold. The x-axis represents the 16S distance  
 618 between the two genomes, while the y-axis represents the proportion of genes in the  
 619 query genome present in the subject genome. Genome - genome comparisons were  
 620 subdivided into series by taxonomic group, with members of the same division  
 621 represented by the same shape and shades of the same color. The dashed black line  
 622 represents exponential regression of the full data set.  $r^2$  values for exponential  
 623 regression of each series were: All data,  $r^2 = 0.60$ ; Actinobacteria,  $r^2 = 0.53$ ;  
 624 Bacteroidetes,  $r^2 = 0.75$  ; Clostridia,  $r^2 = 0.57$ ; Lactobacillales,  $r^2 = 0.70$  ;  $\delta$ -  
 625 Proteobacteria,  $r^2 = 0.63$  ;  $\epsilon$ -Proteobacteria  $r^2 = 0.37$ ;  $\gamma$ -Proteobacteria  $r^2 = 0.60$

626

627

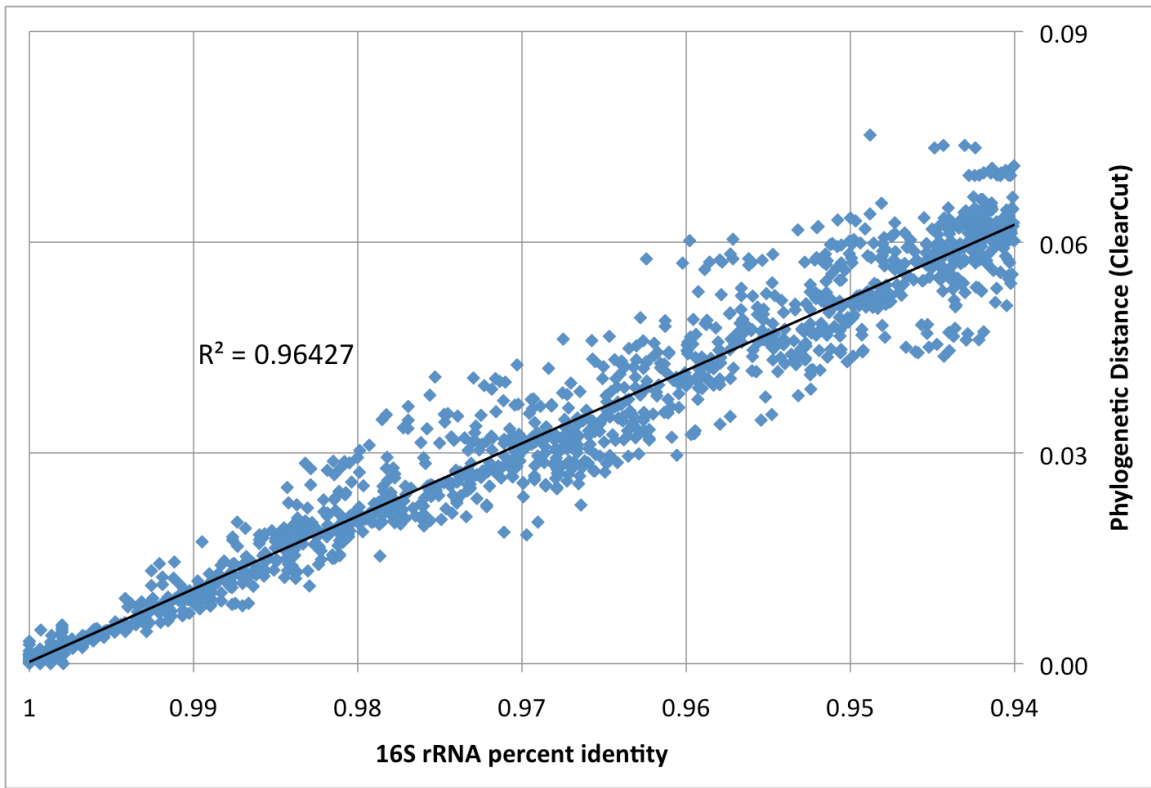

628

629 **Supplemental Figure 2. Correlation between phylogenetic distance and 16S rRNA**

630 **percent identity.**

631

631

632 **Supplemental Tables**

633

634

635

| Taxon                                         | N  | p<br>(Mantel test) | P<br>(Mantel<br>test Log(y)) |
|-----------------------------------------------|----|--------------------|------------------------------|
| Actinobacteria                                | 41 | 0.0000             | 0.0000                       |
| Bacteroidetes                                 | 9  | 0.0001             | 0.0000                       |
| Firmicutes<br>Clostridia                      | 22 | 0.0000             | 0.0000                       |
| Firmicutes -<br>Bacilli<br>(Lactobacillales)  | 43 | 0.0000             | 0.0000                       |
| Proteobacteria -<br>Delta                     | 16 | 0.0000             | 0.0000                       |
| Proteobacteria -<br>Gamma                     | 11 | 0.0004             | 0.0005                       |
| Proteobacteria -<br>Gamma<br>(Enterobacteria) | 28 | 0.0000             | 0.0000                       |

636 **Supplementary Table 1. Significance of correlation between evolutionary distance**

637 **and gene content conservation within diverse taxonomic groups.** Significance was

638 assessed within each taxonomic group using a Mantel test with 10,000 permutations.

639 Values were calculated for either the unmodified matrices or for the log (gene content

640 conservation). In all cases, the correlation between evolutionary distance and gene

641 content conservation was statistically significant

642

643

643

| Taxon                                        | Env | n  | p<br>(Mantel test) | p<br>(Mantel test Log(y)) |
|----------------------------------------------|-----|----|--------------------|---------------------------|
| Actinobacteria                               | N   | 39 | 0.0000             | 0.0000                    |
| Bacteroidetes                                | G   | 4  | 0.0406             | 0.0414                    |
|                                              | N   | 5  | 0.0164             | 0.0175                    |
| Firmicutes -<br>Clostridia                   | G   | 4  | 0.0777             | 0.0844                    |
|                                              | N   | 18 | 0.0000             | 0.0000                    |
| Firmicutes -<br>Lactobacillales              | GC  | 18 | 0.0000             | 0.0000                    |
|                                              | N   | 24 | 0.0000             | 0.0000                    |
| Proteobacteria-<br>Delta                     | N   | 15 | 0.0000             | 0.0000                    |
|                                              | G   | 6  | 0.0207             | 0.0223                    |
|                                              | GC  | 2  | 1.0000             | 1.0000                    |
| Proteobacteria-<br>Epsilon                   | N   | 3  | 1.0000             | 1.0000                    |
|                                              | GC  | 22 | 0.0000             | 0.0000                    |
| Proteobacteria-<br>Gamma<br>(Enterobacteria) | N   | 16 | 0.0000             | 0.0000                    |

644

645 **Supplementary Table 2. Significance of correlation between evolutionary distance**

646 **and gene content conservation within gut specialist, cosmopolitan, or non-gut**

647 **members of diverse taxonomic groups.** Significance was assessed within each

648 taxonomic group using a Mantel test with 10,000 permutations. Values were calculated

649 for either the unmodified matrices or for log (gene content conservation). The

650 correlation between evolutionary distance and gene content conservation was statistically

651 significant, except in cases where very few ( $n < 5$ ) genomes were present in a category.

652 G, gut-specialist to gut specialist comparisons; GC, gut – cosmopolitan to gut-

653 cosmopolitan comparisons; N, non-gut to non-gut comparisons.

654

654  
655

| Taxon                                         | N  | p<br>(Mantel test) | p<br>(Mantel test Log(y)) |
|-----------------------------------------------|----|--------------------|---------------------------|
| Actinobacteria                                | 13 | 0.0000             | 0.0000                    |
| Bacteroidetes                                 | 3  | 0.1609             | 0.1724                    |
| Firmicutes -<br>Clostridia                    | 8  | 0.0000             | 0.0000                    |
| Firmicutes -<br>Lactobacillales               | 7  | 0.0198             | 0.0386                    |
| Proteobacteria -<br>Delta                     | 6  | 0.0027             | 0.0029                    |
| Proteobacteria -<br>Epsilon                   | -  | -                  | -                         |
| Proteobacteria -<br>Gamma<br>(Enterobacteria) | 23 | 0.0001             | 0.0000                    |

656  
657  
658  
659  
660  
661  
662  
663  
664

**Supplementary Table 3. Significance of correlation between evolutionary distance and gene content conservation in plasmids.** Significance was assessed within each taxonomic group using a Mantel test with 10,000 permutations. Values were calculated for either the unmodified matrices or for evolutionary distance and log (gene content conservation). Surprisingly, the correlation between evolutionary distance and gene content conservation was statistically significant, except in Bacteroidetes, where few (n=3) plasmids were present in the data set.
